# Supplementary material for: Research on an XRF-visNIR soil heavy metal exceedance analysis method based on GAS transformation and PCANet
Source: Royal Society of Chemistry journal article supplement (doi:10.1039/d4ja00161c), 2024-01-01
Supplement: d4ja00161c1.pdf [file d4ja00161c1.pdf]

## Supplementary material

Here, the maximum soil samples of 7 heavy metals were selected, and the XRF and visNIR spectra were used for the GAS conversion process. The spectrum is preprocessed and converted by GASF or GADF to complete the drawing of two-dimensional images.

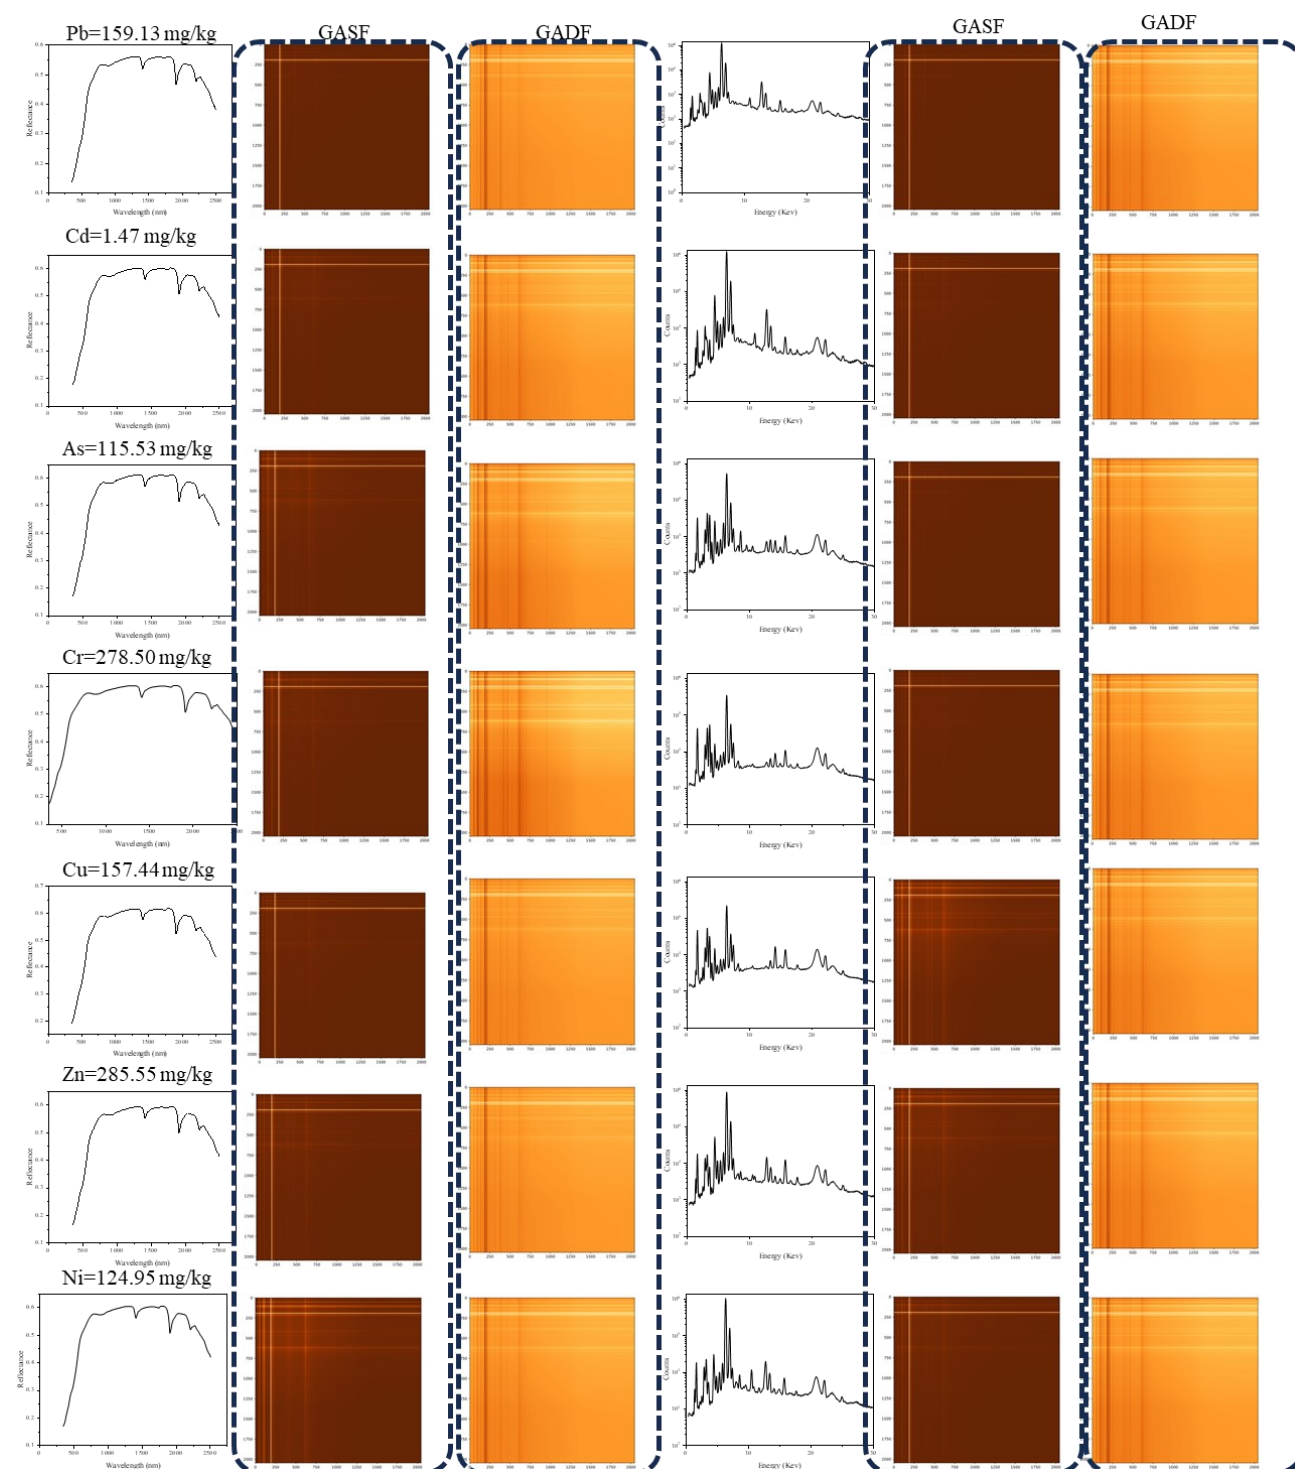

Figure S 1 GAS conversion of visNIR and XRF data from maximum soil heavy metals samples. Seven soil samples were selected, and the corresponding maximum contents of seven heavy metals were Pb=159.13 mg/kg, Cd=1.47 mg/kg,

As=115.53 mg/kg, respectively. Cr=278.50mg/kg, Cu=157.44 mg/kg, Zn=285.55mg/kg, Ni=124.95mg/kg. In the visNIR spectrum, the differences are smaller for each sample. There is a large difference between the spectral peaks in XRF spectrum.

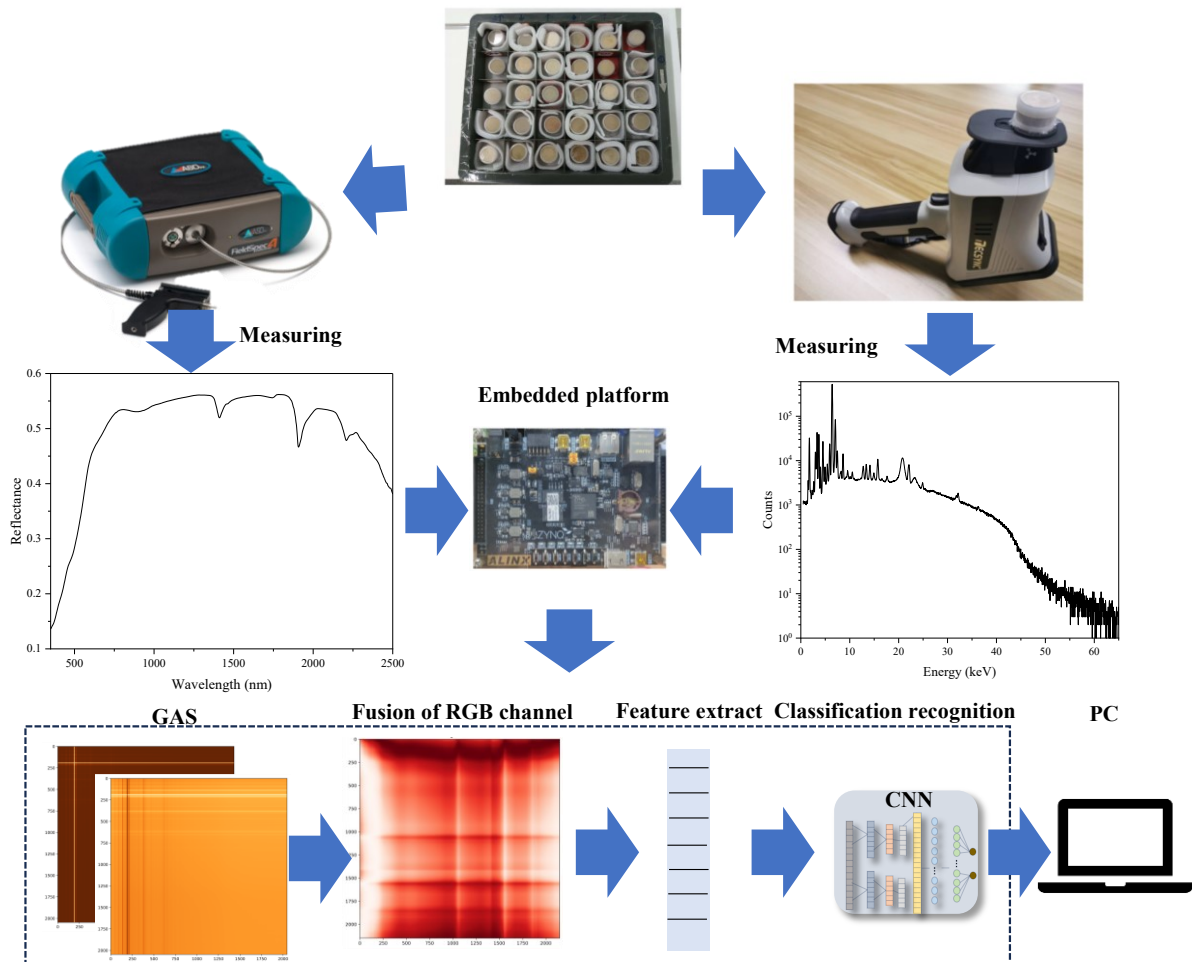

Figure S 2 Measurement and identification of soil by a handheld XRF and visNIR spectrometer.

Soil samples are collected and brought back to the laboratory for necessary pretreatment before being tested using XRF and visNIR spectrometers. After obtaining the spectral data, they are inputted into an embedded platform to undergo a series of processes, including GAS transformation, merging of the RGB channels, PCANet feature extraction, and CNN classification training. The chosen embedded platform is an FPGA development board (Zynq-7000) provided by Shanghai Yiyi Electronic Technology Co., Ltd., China. This development board comprises two ARM Cortex-A9 processor cores which are responsible for running the software of the processor system. It also includes programmable logic, memory, peripheral interfaces, debugging and programming interfaces, as well as power management components. By deploying the pre-trained model onto the embedded platform, the feature variables can be directly recognized. The identification results are then outputted to the computer for further analysis. This approach enables the rapid identification and classification of features in soil samples, providing a convenient and efficient solution for soil heavy metal analysis.

Table S 1 The hyperparameters and the algorithms' training details.

| Algorithms | Selected Parameters (Implementation by Sklearn or Pytorch)                                                                                                                                         |
|------------|----------------------------------------------------------------------------------------------------------------------------------------------------------------------------------------------------|
| 1D-CNN     | <b>Input:</b> 1D data of fusion XRF-visNIR, <b>Batch size</b> =64, <b>Max-epochs</b> =100,<br><b>Optimiser</b> =Adam, <b>Learning rate</b> = $1 \times 10^{-4}$ , $\beta_1=0.99$ , $\beta_2=0.999$ |
| RF         | <b>Input:</b> 1D data of fusion XRF-visNIR, <b>max_depth</b> = 50, <b>n_estimators</b> = 50                                                                                                        |
| KNN        | <b>Input:</b> 1D data of fusion XRF-visNIR, <b>n_neighbours</b> = 2, <b>algorithm</b> ='brute',<br><b>weight</b> ='distance'                                                                       |
| SVM        | <b>Input:</b> 1D data of fusion XRF-visNIR <b>Kernel</b> ='linear', probability = True                                                                                                             |
| XGBoost    | <b>Input:</b> 1D data of fusion XRF-visNIR, $\gamma = 0.1$ , <b>max_depth</b> = 50, <b>learning_rate</b><br>= 0.4                                                                                  |
| MLP        | <b>Input:</b> 1D data of fusion XRF-visNIR, <b>alpha</b> = 0.5, <b>hidden_layer_sizes</b> = 900                                                                                                    |
| GBDT       | <b>Input:</b> 1D data of fusion XRF-visNIR, <b>max_depth</b> = 20, <b>n_estimators</b> = 80,<br><b>learning_rate</b> = 0.12                                                                        |

Table S 2 Statistical data table of heavy metal content in each region of Hongfeng Lake

| Sampling area | Statistical<br>Parameter | North Lake | Back Lake | South Lake | Center Lake | Independent          |
|---------------|--------------------------|------------|-----------|------------|-------------|----------------------|
|               |                          |            |           |            |             | verification<br>area |
| Pb            | Max                      | 159.13     | 92.86     | 124.75     | 115.94      | 104.84               |
|               | Mean                     | 50.08      | 42.81     | 41.19      | 37.97       | 44.93                |
|               | Min                      | 3.28       | 1.72      | 1.40       | 1.90        | 6.09                 |
| Cd            | Max                      | 0.748      | 0.799     | 1.470      | 1.316       | 0.665                |
|               | Mean                     | 0.438      | 0.411     | 0.763      | 0.493       | 0.397                |
|               | Min                      | 0.008      | 0.164     | 0.178      | 0.019       | 0.059                |
| As            | Max                      | 115.53     | 90.62     | 78.42      | 73.44       | 53.56                |
|               | Mean                     | 33.61      | 36.16     | 28.58      | 31.23       | 23.99                |
|               | Min                      | 1.70       | 3.68      | 1.83       | 0.16        | 2.84                 |
| Cr            | Max                      | 278.50     | 191.62    | 167.21     | 151.92      | 198.48               |
|               | Mean                     | 123.83     | 87.47     | 89.79      | 91.58       | 74.19                |
|               | Min                      | 5.00       | 8.49      | 19.98      | 35.93       | 4.14                 |
| Cu            | Max                      | 97.04      | 103.27    | 139.43     | 157.44      | 96.77                |
|               | Mean                     | 40.53      | 51.30     | 56.13      | 51.36       | 43.21                |
|               | Min                      | 2.91       | 4.83      | 1.40       | 0.53        | 3.47                 |
| Zn            | Max                      | 248.58     | 240.46    | 246.39     | 273.49      | 285.55               |
|               | Mean                     | 171.91     | 172.36    | 154.41     | 173.42      | 173.86               |
|               | Min                      | 121.48     | 57.66     | 39.96      | 45.16       | 91.07                |
| Ni            | Max                      | 77.67      | 78.20     | 124.94     | 77.90       | 104.13               |
|               | Mean                     | 58.66      | 59.05     | 58.14      | 57.35       | 55.95                |
|               | Min                      | 41.85      | 38.28     | 19.17      | 41.62       | 5.39                 |

The number of samples from each area of Hongfeng Lake where heavy metal exceedance surpasses the pollution screening values is shown in Table S 3.

Table S 3 The amount of heavy metals exceeded the pollution screening value

| Sampling area                    | Pb<br>( $\geq 70\text{mg/kg}$ ) | Cd<br>( $\geq 0.3\text{mg/kg}$ ) | As<br>( $\geq 40\text{mg/kg}$ ) | Cr<br>( $\geq 150\text{mg/kg}$ ) | Cu<br>( $\geq 50\text{mg/kg}$ ) | Zn<br>( $\geq 200\text{mg/kg}$ ) | Ni<br>( $\geq 60\text{mg/kg}$ ) |
|----------------------------------|---------------------------------|----------------------------------|---------------------------------|----------------------------------|---------------------------------|----------------------------------|---------------------------------|
| North Lake                       | 8                               | 24                               | 8                               | 10                               | 8                               | 7                                | 12                              |
| Back Lake                        | 7                               | 20                               | 12                              | 4                                | 16                              | 10                               | 13                              |
| South Lake                       | 8                               | 26                               | 9                               | 2                                | 23                              | 9                                | 21                              |
| Center Lake                      | 4                               | 29                               | 9                               | 2                                | 19                              | 10                               | 16                              |
| Independent verification<br>area | 8                               | 27                               | 27                              | 3                                | 12                              | 10                               | 16                              |

The data in the table shows varying levels of heavy metal pollution in different areas of Hongfeng Lake. In North Lake area, the heavy metals are primarily concentrated in Cd and Ni, exceeding the limits. In Back Lake, Cd and Cu are the predominant heavy metals. In South Lake area, Cd and Cu are the main pollutants. In Center Lake, Cd, Cu, and Ni are the major contributors to heavy metal contamination. Even in the independent verification area, which is further away from Hongfeng Lake, heavy metal pollution is still present, with Cd and As being the primary contaminants.
